# Supplementary material for: Capacitance of KOH activated carbide-derived carbons
Source: Royal Society of Chemistry journal article supplement (doi:10.1039/b816514a), 2009-01-01
Supplement: b816514a.pdf [file b816514a.pdf]

## Electronic Supplementary Information†

### Capacitance of KOH Activated Carbide-Derived Carbons

Cristelle Portet<sup>a</sup>, Maria Ángeles Lillo-Ródenas<sup>b</sup>, Angel Linares-Solano<sup>b</sup>, Yury Gogotsi<sup>a</sup>

<sup>a</sup>*Drexel University, Materials Science and Engineering, 3141 Chestnut Street, Philadelphia, PA, 19104*

<sup>b</sup>*Universidad de Alicante, Dept. Química Inorgánica, Ap. Correos 99, E-03080, Alicante, Spain*

**Table S1:** Porosity characteristics<sup>†</sup> and electrochemical performance of as-produced and KOH activated CDC.

| Carbon           | BET SSA (m <sup>2</sup> /g) | Micropore volume (cm <sup>3</sup> /g) | Narrow* micropore volume (cm <sup>3</sup> /g) | Average pore size (nm) | Gravimetric capacitance (F/g)** |
|------------------|-----------------------------|---------------------------------------|-----------------------------------------------|------------------------|---------------------------------|
| 400°C            | 1092                        | 0.51                                  | 0.51                                          | 0.65                   | 131                             |
| 500°C            | 1285                        | 0.60                                  | 0.60                                          | 0.68                   | 140                             |
| 600°C            | 1235                        | 0.59                                  | 0.57                                          | 0.70                   | 143                             |
| 800°C            | 1368                        | 0.66                                  | 0.61                                          | 0.80                   | 125                             |
| 1000°C           | 1483                        | 0.63                                  | 0.45                                          | 1.10                   | 95                              |
| 400°C-activated  | 2139                        | 1.02                                  | 0.77                                          | 0.90                   | 150                             |
| 500°C-activated  | 1991                        | 0.93                                  | 0.72                                          | 0.90                   | 159                             |
| 600°C-activated  | 1723                        | 0.82                                  | 0.66                                          | 1.17                   | 179                             |
| 800°C-activated  | 1980                        | 0.93                                  | 0.70                                          | 1.20                   | 171                             |
| 1000°C-activated | 1708                        | 0.64                                  | 0.47                                          | 1.30                   | 103                             |

<sup>†</sup> Previous papers reported pore size and volume calculated using a NL DFT model and this should be taken into account when comparing with other publications on CDC.

\* Pores <0.7 nm.

\*\* Measured from galvanostatic cycling at I=20 mA.

**Table S2:** Porosity characteristics and electrochemical performances of microporous carbons produced from phenolic resin (sample 1) or anthracite (samples 2-4) and activated in KOH.

| Carbon | BET SSA (m <sup>2</sup> /g) | Micropore volume (cm <sup>3</sup> /g) | Narrow* micropore volume (cm <sup>3</sup> /g) | Average pore size (nm) | Gravimetric capacitance (F/g) |
|--------|-----------------------------|---------------------------------------|-----------------------------------------------|------------------------|-------------------------------|
| AC 1   | 1111                        | 0.50                                  | 0.52                                          | 0.80                   | 102                           |
| AC 2   | 1594                        | 0.74                                  | 0.73                                          | 0.80                   | 125                           |
| AC 3   | 1973                        | 0.95                                  | 0.81                                          | 1.05                   | 155                           |
| AC 4   | 3183                        | 1.25                                  | 0.72                                          | 1.35                   | 160                           |

\*Pores <0.7 nm

\*\* Measured from galvanostatic cycling at I=20 mA.
